# Supplementary material
Source: publisher site journal article supplement (https://www.dovepress.com/article/307368)
Supplement: Supplementary file 1 [file get_supplementary_file.php]

**Supplementary Table 1.** Characteristics of the low and high ANC group

| **Characteristics** | **Total**  **(n=71)** | **Low ANC group (n=34)** | **High ANC group (n=37)** | **P value** |
| --- | --- | --- | --- | --- |
| **Male, N (%)** | 51 (71.8) | 26 (76.5) | 25 (67.6) | 0.405 |
| **Age at start anlotinib (years)** | 68± 9 | 66± 9 | 70± 8 | 0.055 |
| **Tobacco** **history, N (%)** | 45 (63.4) | 22 (64.7) | 23 (62.2) | 0.824 |
| **ECOG PS****=1, N (%)** | 22 (31.0) | 5 (14.7) | 17 (45.9) | 0.004 * |
| **NSCLC, N (%)** | 63 (88.7) | 29 (85.3) | 34 (91.9) | 0.467 |
| **With bone/brain/liver metastasis sites, N (%)** | 64 (90.1) | 30 (88.2) | 34 (91.9) | 0.703 |
| **With lymphatic metastasis N (%)** | 61 (85.9) | 27 (79.4) | 34 (91.9) | 0.178 |
| **Number of metastatic sites** **≤ 1, N (%)** | 12 (16.9) | 4 (11.8) | 8 (21.6) | 0.268 |
| **Clinical stage IV, N (%)** | 56 (78.9) | 28 (82.4) | 28 (75.7) | 0.491 |
| **With gene mutation, N (%)** | 7 (9.9) | 3 (8.8) | 4 (10.8) | 1.000 |
| **Prior lines of therapy** **> 3, N (%)** | 28 (39.4) | 14 (41.2) | 14 (37.8) | 0.774 |
| **With Previous Chemotherapy, N (%)** | 54 (79.4) | 28 (84.8) | 26 (74.3) | 0.282 |
| **With Previous Radiotherapy, N (%)** | 15 (22.1) | 5 (15.2) | 10 (28.6) | 0.182 |
| **With Previous Targeted treatment, N (%)** | 27 (39.7) | 13 (39.4) | 14 (40.0) | 0.959 |
| **With Previous PD-1 inhibitor, N (%)** | 1 (1.5) | 1 (3.0) | 0 (0) | 0.485 |

Differences in clinical characters between the two groups were evaluated using t-test for continuous variables, while the Chi-squared test and Fisher exact probability method were used for categorical variables. * *p*<0.05

Abbreviations: NSCLC, non-small cell lung cancer; EGFR, epidermal growth factor receptor; PD-1, programmed cell death protein-1.
